# Supplementary material for: Dynamic Assessment of Tissue and Plasma EGFR-Activating and T790M Mutations with Droplet Digital PCR Assays for Monitoring Response and Resistance in Non-Small Cell Lung Cancers Treated with EGFR-TKIs
Source: MDPI journal article supplement (doi:10.3390/ijms231911353), 2022-09-26
Supplement: s1 [file s1]

**Supplemental Table S1.** Multivariate analysis of clinicopathological parameters associating with the detection of tissue *EGFR* T790M or plasma *EGFR* activating mutations at baseline.

| Factors            | Number of cases | Tissue T790M +        |              |          | Plasma <i>EGFR</i> m+ |             |                   |
|--------------------|-----------------|-----------------------|--------------|----------|-----------------------|-------------|-------------------|
|                    |                 | Multivariate analysis |              |          | Multivariate analysis |             |                   |
|                    |                 | Odds ratio            | 95% CI       | <i>P</i> | Odds ratio            | 95% CI      | <i>P</i>          |
| Sex                |                 |                       |              |          |                       |             |                   |
| Male               | 61              | 1                     |              |          | 1                     |             |                   |
| Female             | 76              | 1.27                  | (0.30-5.45)  | 0.75     | 1.83                  | (0.58-5.80) | 0.31              |
| Age                |                 |                       |              |          |                       |             |                   |
| ≤ 65 y/o           | 58              | 1                     |              |          | 1                     |             |                   |
| > 65 y/o           | 79              | 0.59                  | (0.20-1.78)  | 0.35     | 1.22                  | (0.47-3.13) | 0.68              |
| Smoking history    |                 |                       |              |          |                       |             |                   |
| Never smoker       | 101             | 1                     |              |          | 1                     |             |                   |
| Smoker             | 36              | 3.08                  | (0.69-13.88) | 0.14     | 1.82                  | (0.51-6.41) | 0.35              |
| First-line therapy |                 |                       |              |          |                       |             |                   |
| Afatinib           | 74              | 1                     |              |          | 1                     |             |                   |
| Erlotinib          | 41              | 1.03                  | (0.33-3.19)  | 0.96     | 0.8                   | (0.28-2.23) | 0.66              |
| Gefitinib          | 22              | 0.39                  | (0.06-2.57)  | 0.33     | 0.25                  | (0.07-0.93) | 0.04 <sup>a</sup> |
| Primary tumor size |                 |                       |              |          |                       |             |                   |
| > 40 mm            | 62              | 1                     |              |          | 1                     |             |                   |
| ≤ 40 mm            | 58              | 2.69                  | (0.79-9.15)  | 0.11     | 3.77                  | (1.25-11.4) | 0.02 <sup>a</sup> |
| n.a.               | 17              |                       |              |          |                       |             |                   |
| Tumor category     |                 |                       |              |          |                       |             |                   |
| T1                 | 25              | 1                     |              |          | 1                     |             |                   |
| T2                 | 50              | 3.43                  | (0.66-17.93) | 0.14     | 1.45                  | (0.41-5.15) | 0.57              |
| T3                 | 20              | 1.58                  | (0.20-12.56) | 0.66     | 1.43                  | (0.26-7.72) | 0.68              |

|                      |    |      |              |                         |      |             |                         |
|----------------------|----|------|--------------|-------------------------|------|-------------|-------------------------|
| T4                   | 42 | 2.45 | (0.43-13.99) | <i>0.31</i>             | 0.81 | (0.22-3.02) | <i>0.76</i>             |
| Nodal status         |    |      |              |                         |      |             |                         |
| N0                   | 43 | 1    |              |                         | 1    |             |                         |
| N1                   | 15 | 0.28 | (0.04-1.78)  | <i>0.18</i>             | 1.19 | (0.25-5.78) | <i>0.83</i>             |
| N2                   | 43 | 0.37 | (0.10-1.33)  | <i>0.13</i>             | 1.15 | (0.39-3.36) | <i>0.80</i>             |
| N3                   | 36 | 0.16 | (0.03-0.79)  | <i>0.03<sup>a</sup></i> | 4.55 | (1.24-16.7) | <i>0.03<sup>a</sup></i> |
| Metastasis status    |    |      |              |                         |      |             |                         |
| M0                   | 3  | 1    |              |                         | 1    |             |                         |
| M1a                  | 35 | N/A  | N/A          | <i>N/A</i>              | 0.89 | (0.05-15.3) | <i>0.94</i>             |
| M1b                  | 75 | N/A  | N/A          | <i>N/A</i>              | 1.38 | (0.07-27.9) | <i>0.83</i>             |
| M1c                  | 24 | N/A  | N/A          | <i>N/A</i>              | 1.05 | (0.05-24.4) | <i>0.97</i>             |
| <i>EGFR</i> mutation |    |      |              |                         |      |             |                         |
| L858R                | 77 | 1    |              |                         | 1    |             |                         |
| E19del               | 60 | 0.95 | (0.34-2.68)  | <i>0.92</i>             | N/A  | N/A         | <i>N/A</i>              |
| Brain-Metastasis     |    |      |              |                         |      |             |                         |
| Yes                  | 56 | 1    |              |                         | 1    |             |                         |
| No                   | 81 | 0.19 | (0.05-0.67)  | <i>0.01<sup>a</sup></i> | 1.36 | (0.45-4.05) | <i>0.59</i>             |
| Bone-Metastasis      |    |      |              |                         |      |             |                         |
| Yes                  | 71 | 1    |              |                         | 1    |             |                         |
| No                   | 66 | 1.08 | (0.34-3.47)  | <i>0.90</i>             | 0.29 | (0.10-0.87) | <i>0.03<sup>a</sup></i> |

<sup>a</sup>  $P < 0.05$ , indicating significant

n.a.: Not available

N/A: Not applicable
